# Supplementary material for: Effect of Coenzyme Q10 Supplementation in Statin-Treated Obese Rats
Source: PubMed Central journal article supplement — Biomol Ther (Seoul). 2016 Mar 1;24(2):171–7. doi: 10.4062/biomolther.2015.089 (PMC4774498; doi:10.4062/biomolther.2015.089), 2016-03-01
Supplement: bt-24-171-suppl.pdf [file bt-24-171-suppl.pdf]

Supplemental Table 1. Composition of normal diet and high-fat diet (g/100g).

| Ingredient           | Normal diet | High-fat diet* |
|----------------------|-------------|----------------|
| Casein               | 20.0        | 29.0           |
| Corn Starch          | 60.0        | 10.0           |
| Sucrose              | -           | 10.0           |
| Corn Oil             | 9.0         | 5.0            |
| Cellulose            | 5.0         | 5.0            |
| Lard                 | -           | 35.0           |
| AIN-76 Mineral Mix*  | 3.5         | 3.5            |
| AIN-76 Vitamin Mix*  | 1.0         | 1.0            |
| DL-Methionine        | 0.3         | 0.3            |
| Choline Bitartrate   | 0.2         | 0.2            |
| kcal/100g diet       | 390.2       | 458.0          |
| Calorie from fat (%) | 11.5        | 35.0           |

\* High-fat diet diet was modified from the AIN-76 dietary composition (Reeves *et al.*, 1993).

Supplemental Table 2. Experimental groups.

| Group  | Diet composition | Treatment                                     |
|--------|------------------|-----------------------------------------------|
| N      | Normal diet      | vehicle                                       |
| NSC270 | Normal diet      | Statin 60 mg/kg + CoQ <sub>10</sub> 270 mg/kg |
| H      | High-fat Diet    | vehicle                                       |
| HS     | High-fat Diet    | Statin 60 mg/kg                               |
| HC     | High-fat Diet    | CoQ <sub>10</sub> 270 mg/kg                   |
| HSC30  | High-fat Diet    | Statin 60 mg/kg + CoQ <sub>10</sub> 30 mg/kg  |
| HSC90  | High-fat Diet    | Statin 60 mg/kg + CoQ <sub>10</sub> 90 mg/kg  |
| HSC270 | High-fat Diet    | Statin 60 mg/kg + CoQ <sub>10</sub> 270 mg/kg |

1% Tween-80 + 0.5% Sodium Carboxymethyl Cellulose (CMC) Na<sup>+</sup> was used as vehicle.

Supplemental Table 3. Effect of CoQ<sub>10</sub> supplementation on body weight and FER in the Statin-treated obese rats.

| Group  | Body weight (g)                 | FER                            |
|--------|---------------------------------|--------------------------------|
| N      | 433.30 ± 6.13 <sup>\$\$</sup>   | 0.125 ± 0.02 <sup>\$\$\$</sup> |
| NSC270 | 417.10 ± 7.12 <sup>\$\$\$</sup> | 0.120 ± 0.03 <sup>\$\$\$</sup> |
| H      | 475.30 ± 9.06 <sup>**</sup>     | 0.213 ± 0.02 <sup>***</sup>    |
| HS     | 473.60 ± 6.61 <sup>**</sup>     | 0.198 ± 0.03 <sup>**</sup>     |
| HC     | 464.40 ± 7.79 <sup>*</sup>      | 0.194 ± 0.03 <sup>*</sup>      |
| HSC30  | 462.10 ± 5.95                   | 0.194 ± 0.02 <sup>*</sup>      |
| HSC90  | 461.40 ± 5.71                   | 0.193 ± 0.02 <sup>*</sup>      |
| HSC270 | 436.90 ± 4.84 <sup>\$\$</sup>   | 0.184 ± 0.01 <sup>*</sup>      |

Values are means ± S.E. (n=10). FER: Food efficiency ratio, \*  $p < 0.05$ , \*\*  $p < 0.01$ , \*\*\*  $p < 0.001$  vs. normal diet group, \$\$  $p < 0.01$ , \$\$\$  $p < 0.001$  vs. high-fat diet with Statin group. N: normal diet group, NSC270: normal diet with Statin and CoQ<sub>10</sub> (270 mg/kg) group, H: high-fat diet group, HS: high-fat diet with Statin group, HC: high-fat diet with CoQ<sub>10</sub> (270 mg/kg) group, and HSC30, HSC90, HSC270: high-fat diet with Statin and CoQ<sub>10</sub> at various doses (30, 90 or 270 mg/kg) group.
